# Supplementary material for: Versatile carrier-free binary nanodrug based on metformin/epigallocatechin gallate nanoparticles: exploring its properties and potential in cancer treatment
Source: Royal Society of Chemistry journal article supplement (doi:10.1039/d4bm01356e), 2024-12-19
Supplement: d4bm01356e1.pdf [file d4bm01356e1.pdf]

# Versatile Carrier-Free Binary Nanodrugs Based on Metformin/Epigallocatechin Gallate Nanoparticles: Exploring Its Properties and Potential in Cancer Treatment

Huiyu Zou<sup>a#</sup>, ErKang Bian<sup>a#</sup>, Jinyun He<sup>a</sup>, Wuming Wu<sup>b\*</sup>, Chunyan Deng<sup>a\*</sup>

*<sup>a</sup>Hunan Provincial Key Laboratory of Micro & Nano Materials Interface Science, College of Chemistry and Chemical Engineering, Central South University, Changsha 410083, China.*

*<sup>b</sup>School of Electronic Science and Engineering, Hunan University of Information Technology, Changsha, 410151, China.*

# Huiyu Zou and ErKang Bian contributed equally to this manuscript.

\***Corresponding Author:** Chunyan Deng, Wuming Wu

Phone: +86-731-88876490. Fax: +86-731-88879616.

E-mail: [dengchunyan@csu.edu.cn](mailto:dengchunyan@csu.edu.cn); [wuwuming@hnuit.edu.cn](mailto:wuwuming@hnuit.edu.cn)

## Table of content

**Fig. S1.** SEM images and digital photograph (insert) of A. Met-EGCG NPs, B. 23% ethanol + Met-EGCG NPs, C. 28.6% ethanol + Met-EGCG NPs, D. 37.5% ethanol + Met-EGCG NPs, E. 37.5% ethanol + Met-EGCG NPs + 1 mL H<sub>2</sub>O, F. The formation mechanism for the controllable size of Met-EGCG NPs.

**Fig. S2.** Digital photos of Met-EGCG NPs with different pH.

**Fig. S3.** Zeta potential of Met-EGCG NPs synthesized at different pH.

**Fig. S4.** FL pictures of (A) EGCG solution at a. bright filed, b. blue irradiation, c. green irradiation; (B) metformin at a. bright filed, b. blue irradiation, c. green irradiation and (C) Met-EGCG NPs at a. bright filed, b. blue irradiation, c. green irradiation.

**Fig. S5.** Fluorescence intensity of Met-EGCG NPs at different concentrations, a. 0.1 mg mL<sup>-1</sup>, b. 0.3 mg mL<sup>-1</sup>, c. 0.5 mg mL<sup>-1</sup>, d. 0.7 mg mL<sup>-1</sup>, e. 0.9 mg mL<sup>-1</sup>, f. 1.25 mg mL<sup>-1</sup>, g. 2.5 mg mL<sup>-1</sup>. (excitation wavelength: 280 nm).

**Fig. S6.** UV-Vis absorbance spectra of (A) DPPH• exposed to different concentrations of Met-EGCG NPs, from top to bottom: 0, 2.5, 5, 10, and 20 µg mL<sup>-1</sup>. Insert: Digital photograph showing the color of each reaction solution. (B) Corresponding clearance kinetic curves (Concentration of Met-EGCG NPs: a. 0 µg mL<sup>-1</sup>, b. 2.5 µg mL<sup>-1</sup>, c. 5 µg mL<sup>-1</sup>, d. 10 µg mL<sup>-1</sup>, e. 20 µg mL<sup>-1</sup>) (C) ABTS+• exposed to different concentrations of Met-EGCG NPs, from top to bottom: 0, 2.5, 5, 10, and 20 µg mL<sup>-1</sup>. Insert: Digital photograph showing the color of each reaction solution. (D) Corresponding clearance kinetic curves (a. 0 µg mL<sup>-1</sup>, b. 2.5 µg mL<sup>-1</sup>, c. 5 µg mL<sup>-1</sup>, d. 10 µg mL<sup>-1</sup>, e. 20 µg mL<sup>-1</sup>).

**Fig. S7.** The biocompatibility of metformin in L929 cells.

**Fig. S8.** UV-vis curves of Met-EGCG NPs after treated with different temperature.

**Fig. S9.** Stability of Met-EGCG NPs under acidic conditions. A. pH 3, 2 h; B. pH 4, 2 h; C. pH 5, 2 h; D. pH 6, 24 h; E. pH 3, 24 h; F. pH 4, 24 h; G. pH 5, 24 h; H. pH 6, 24 h.

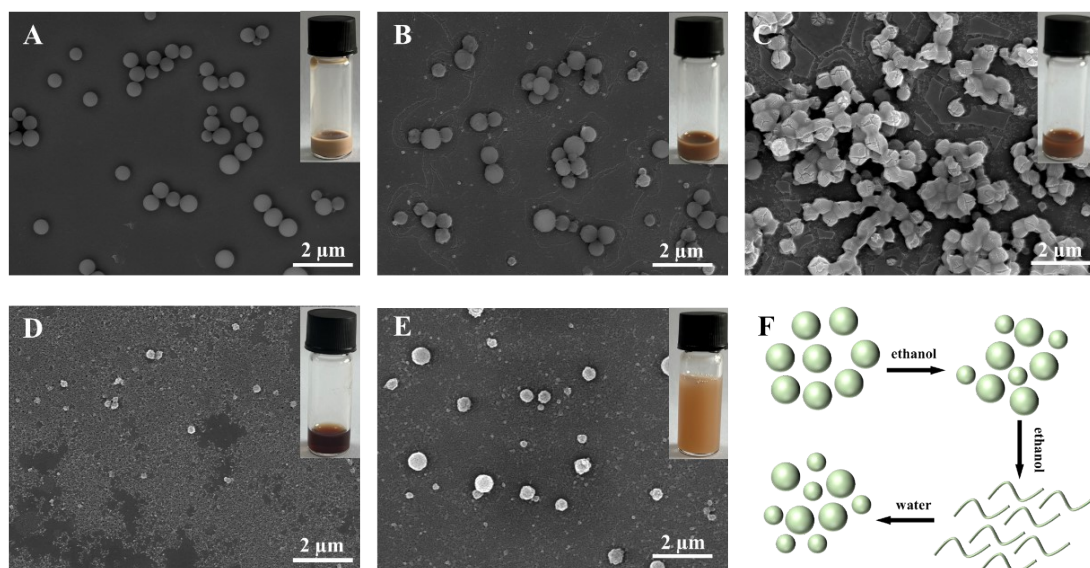

**Fig. S1.** SEM images and digital photograph (insert) of A. Met-EGCG NPs, B. 23% ethanol + Met-EGCG NPs, C. 28.6% ethanol + Met-EGCG NPs, D. 37.5% ethanol + Met-EGCG NPs, E. 37.5% ethanol + Met-EGCG NPs + 1 mL H<sub>2</sub>O, F. The formation mechanism for the controllable size of Met-EGCG NPs.

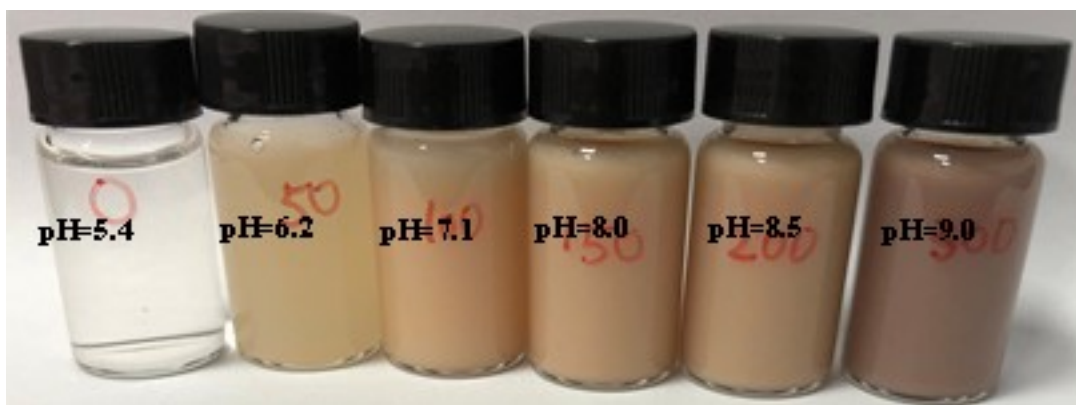

**Fig. S2.** Digital photos of Met-EGCG NPs with different pH.

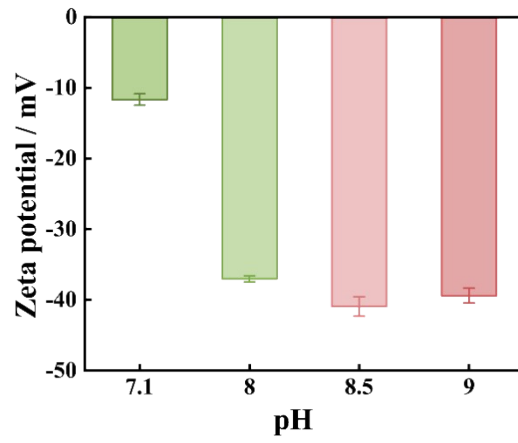

**Fig. S3.** Zeta potential of Met-EGCG NPs synthesized at different pH.

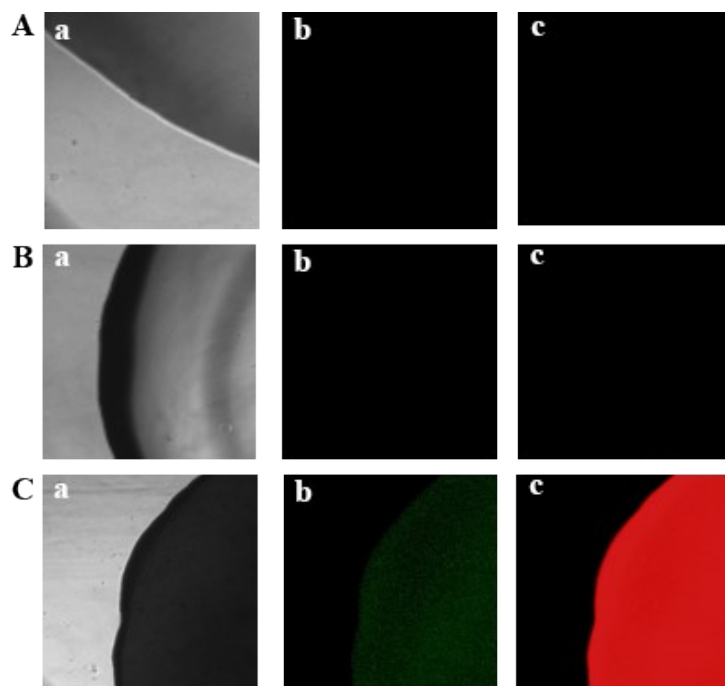

**Fig. S4.** FL pictures of (A) EGCG solution at a. bright filed, b. blue irradiation, c. green irradiation; (B) metformin at a. bright filed, b. blue irradiation, c. green irradiation and (C) Met-EGCG NPs at a. bright filed, b. blue irradiation, c. green irradiation.

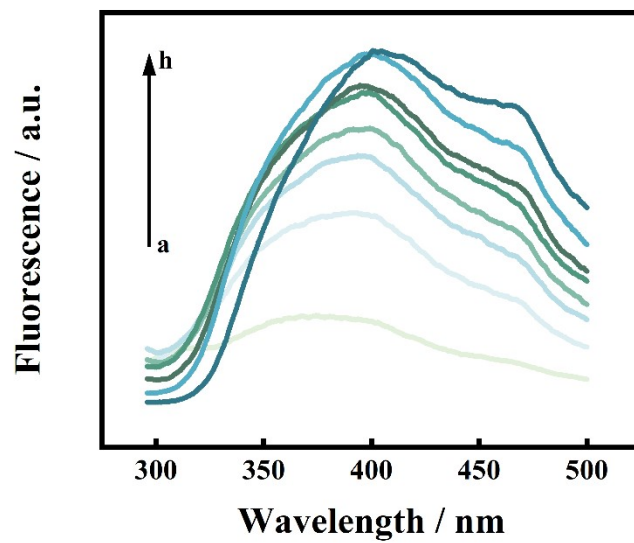

**Fig. S5.** Fluorescence intensity of Met-EGCG NPs at different concentrations, a.  $0.1 \text{ mg mL}^{-1}$ , b.  $0.3 \text{ mg mL}^{-1}$ , c.  $0.5 \text{ mg mL}^{-1}$ , d.  $0.7 \text{ mg mL}^{-1}$ , e.  $0.9 \text{ mg mL}^{-1}$ , f.  $1.25 \text{ mg mL}^{-1}$ , g.  $2.5 \text{ mg mL}^{-1}$ . (excitation wavelength: 280 nm).

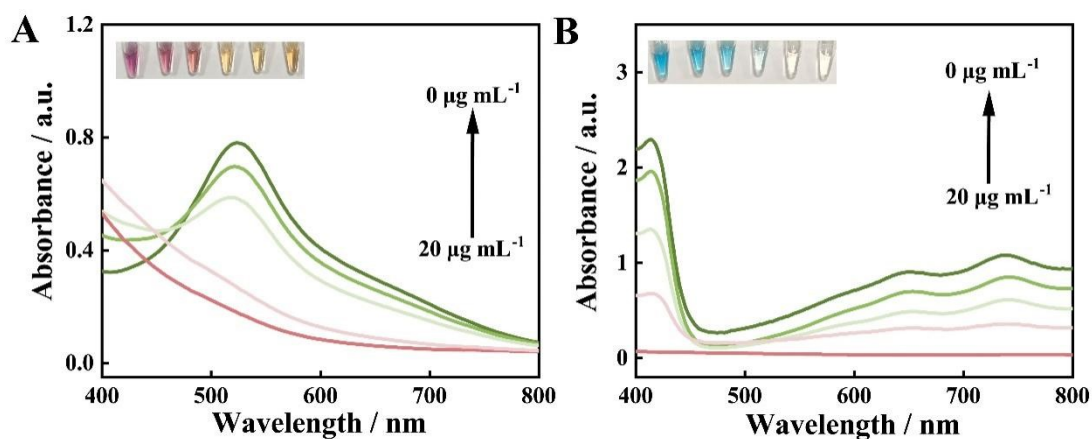

**Fig. S6.** UV-Vis absorbance spectra of (A) DPPH• exposed to different concentrations of Met-EGCG NPs, from top to bottom: 0, 2.5, 5, 10, and 20  $\mu\text{g mL}^{-1}$ . Insert: Digital photograph showing the color of each reaction solution. (B) Corresponding clearance kinetic curves (Concentration of Met-EGCG NPs: a. 0  $\mu\text{g mL}^{-1}$ , b. 2.5  $\mu\text{g mL}^{-1}$ , c. 5  $\mu\text{g mL}^{-1}$ , d. 10  $\mu\text{g mL}^{-1}$ , e. 20  $\mu\text{g mL}^{-1}$ ) (C) ABTS+• exposed to different concentrations of Met-EGCG NPs, from top to bottom: 0, 2.5, 5, 10, and 20  $\mu\text{g mL}^{-1}$ . Insert: Digital photograph showing the color of each reaction solution. (D) Corresponding clearance kinetic curves (a. 0  $\mu\text{g mL}^{-1}$ , b. 2.5  $\mu\text{g mL}^{-1}$ , c. 5  $\mu\text{g mL}^{-1}$ , d. 10  $\mu\text{g mL}^{-1}$ , e. 20  $\mu\text{g mL}^{-1}$ ).



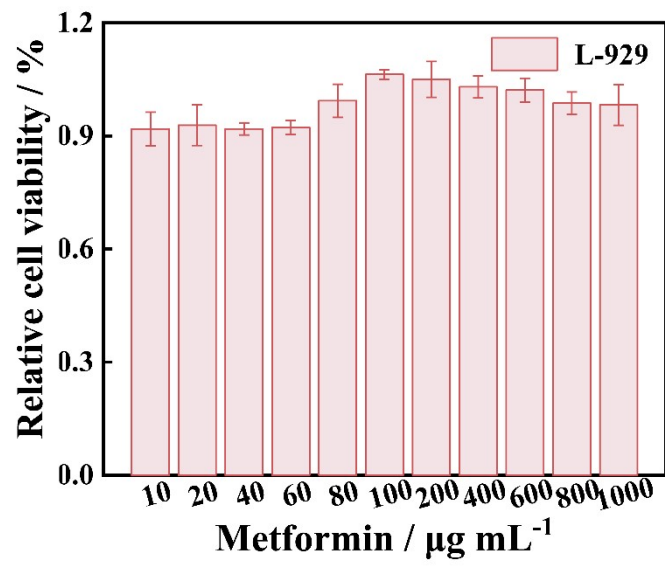

Fig. S7. The biocompatibility of metformin in L929 cells.

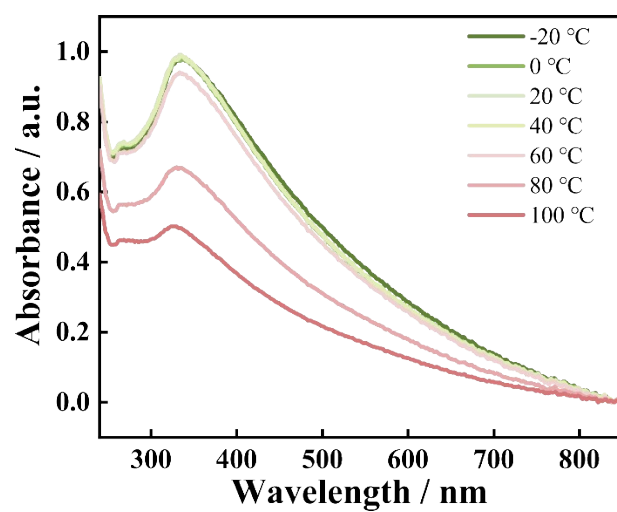

**Fig. S8.** UV-vis curves of Met-EGCG NPs after treated with different temperature.

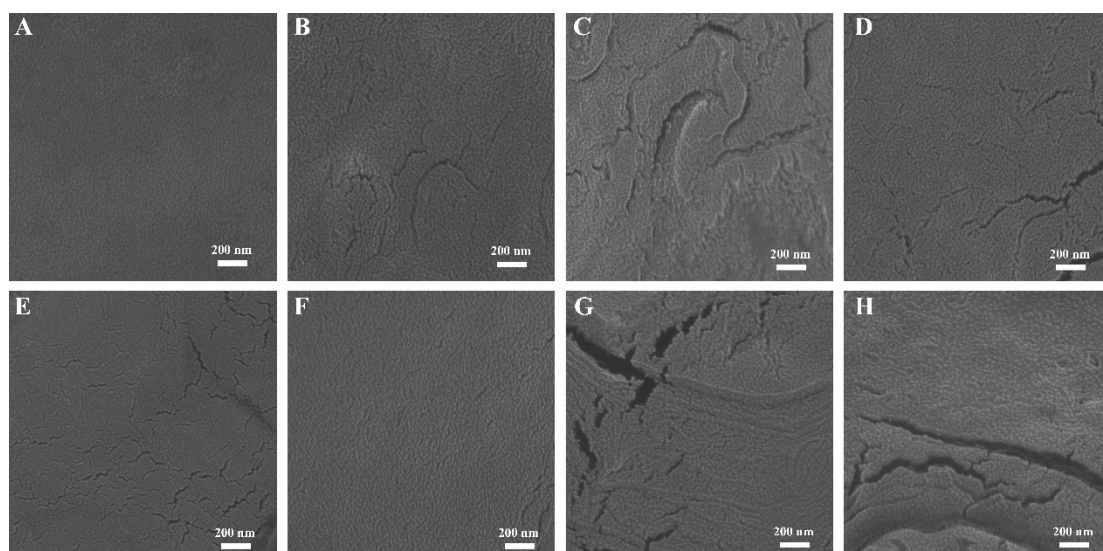

**Fig. S9.** Stability of Met-EGCG NPs under acidic conditions. A. pH 3, 2 h; B. pH 4, 2 h; C. pH 5, 2 h; D. pH 6, 24 h; E. pH 3, 24 h; F. pH 4, 24 h; G. pH 5, 24 h; H. pH 6, 24 h.
